# Supplementary material for: Asymmetric protonation of lithium enolates of α-amino acid derivatives with α-amino acid-based chiral Brønsted acids
Source: Royal Society of Chemistry journal article supplement (doi:10.1039/b211523a), 2003-01-01
Supplement: b211523a.doc [file b211523a.doc]

**Supplementary Information**

**Asymmetric protonation of lithium enolates of -amino acid derivatives**

**with -amino acid-based chiral Brønsted acids**

**Kentaro Futatsugi**†**a, Akira Yanagisawab and Hisashi Yamamoto**†***a**

*aGraduate School of Engineering, Nagoya University, SORST, Japan Science and Technology Corporation (JST), Chikusa, Nagoya 464-8603, Japan.*

*bDepartment of Chemistry, Faculty of Science, Chiba University, Inage, Chiba 263-8522, Japan*

*E-mail: yamamoto@uchicago.edu*

Procedure for protonation of lithium enolate of **5** with chiral amide **1ag**: To a solution of 2-bromomesitylene (0.067 mL, 0.44 mmol) in dry ether (3 mL) was added dropwise a solution of *t*-BuLi (1.45M, 0.61 mL, 0.88 mmol) in pentane at –78 °C under argon atmosphere. After being stirred for 1 h at –78 °C, a solution of racemic alanine derivative **5** (110 mg, 0.40 mmol) in dry ether (4 mL) was added at –78 °C. The reaction mixture was held at this temperature for 1 h, then divided into two equal parts. One half of the resulting reaction mixture was quenched by D2O (0.3 mL) and the rate of enolization was determined to be >99% by 1H NMR analysis (a peak at  = 4.18 ppm observed for the product **5** was almost disappeared). To the other half of mixture was added dropwise a solution of chiral amide **1ag** (133 mg, 0.22 mmol) in dry THF (4 mL) at –20 °C. After being stirred for 2.5 h, D2O (0.3 mL) was added to determine the percentage of the unreacted lithium enolate (10% deuteration in quench) and the mixture was gradually warmed to room temperature. A saturated NH4Cl solution was then added, and the organic material was extracted three times with ether. The combined organic extracts were dried over MgSO4 and concentrated in vacuo. The crude product was purified by column chromatography on silica gel to give the (*R*)-enriched alanine derivative **5** (38 mg, 73% isolated yield) with 87% ee [corrected value based on the percentage (90%) of protonation by **1ag** and observed ee (79% ee)]. The enantiomeric ratio was determined by HPLC analysis using a chiral column (Chiralcel OJ, Daicel Chemical Industries, Ltd., hexane/*i*-PrOH = 20/1, flow rate = 0.2 mL/min): *t*R = 62.5 min (*S*-isomer); *t*R = 86.2 min (*R*-isomer). The absolute configuration was determined by comparison with published data.1

† Present address: Department of Chemistry, University of Chicago, 5735 South Ellis Avenue, Chicago, IL 60637, USA

**References**

1 R. Polt, M. A. Peterson, L. De Young, *J. Org. Chem.*, 1992, **57**, 5469.
